# Supplementary material
Source: PubMed Central journal article supplement (PMC4935584)

**Supplemental Table 1S.** Interactions between selected subgroups and adipokine values on the composite endpoint of CV death, non-procedural MI and stroke.

| Outcome:<br>CV Death/Non-Procedural MI/Stroke<br>Events/N in subgroup at baseline | IP Group<br>191/1163 |          | IS Group<br>173/1167 |          | Inter-<br>action<br><i>P</i> | Below Median<br>BMI ≤31<br>170/1112 |          | Above Median<br>BMI >31<br>194/1218 |          | Inter-<br>action<br><i>P</i> |
|-----------------------------------------------------------------------------------|----------------------|----------|----------------------|----------|------------------------------|-------------------------------------|----------|-------------------------------------|----------|------------------------------|
|                                                                                   | HR                   | <i>P</i> | HR                   | <i>P</i> |                              | HR                                  | <i>P</i> | HR                                  | <i>P</i> |                              |
|                                                                                   | (95% CI)             |          | (95% CI)             |          |                              | (95% CI)                            |          | (95% CI)                            |          |                              |
| Baseline Log leptin                                                               | 0.8<br>(0.7, 0.9)    | .009     | 0.9<br>(0.8, 1.1)    | .32      | .27                          | 0.7<br>(0.6, 0.9)                   | <.001    | 1.1<br>(0.9, 1.3)                   | .62      | .01                          |
| Change from Baseline Log leptin                                                   | 0.8<br>(0.7, 1.0)    | .02      | 0.8<br>(0.7, 0.9)    | .008     | .84                          | 0.8<br>(0.6, 0.9)                   | .002     | 0.9<br>(0.7, 1.0)                   | .07      | .39                          |
| Baseline Log adiponectin                                                          | 1.3<br>(1.1, 1.6)    | .002     | 1.1<br>(0.9, 1.3)    | .34      | .12                          | 1.3<br>(1.1, 1.6)                   | .01      | 1.1<br>(1.0, 1.3)                   | .13      | .84                          |
| Change from Baseline Log adiponectin                                              | 1.1<br>(0.9, 1.4)    | .35      | 1.0<br>(0.8, 1.2)    | .67      | .32                          | 1.4<br>(1.1, 1.7)                   | .001     | 0.9<br>(0.7, 1.0)                   | .07      | .04                          |
| Baseline Log MCP-1                                                                | 1.0<br>(0.9, 1.2)    | .68      | 0.8<br>(0.7, 1.0)    | .04      | .07                          | 0.8<br>(0.7, 1.0)                   | .05      | 1.0<br>(0.8, 1.1)                   | .82      | .09                          |
| Change from Baseline Log MCP-1                                                    | 1.2<br>(0.9, 1.4)    | .15      | 0.9<br>(0.7, 1.1)    | .33      | .09                          | 1.4<br>(1, 1.8)                     | .02      | 0.9<br>(0.8, 1.1)                   | .55      | .22                          |
| Baseline Log leptin/adiponectin                                                   | 0.7<br>(0.6, 0.9)    | <.001    | 0.9<br>(0.7, 1.1)    | .18      | .12                          | 0.7<br>(0.6, 0.8)                   | <.001    | 0.9<br>(0.8, 1.1)                   | .57      | .09                          |
| Change from Baseline Log leptin/adiponectin                                       | 0.8<br>(0.7, 1.0)    | .03      | 0.8<br>(0.7, 1.0)    | .05      | .94                          | 0.7<br>(0.6, 0.8)                   | <.001    | 1.0<br>(0.8, 1.2)                   | .65      | .12                          |
| Baseline Log leptin/BMI                                                           | 0.8                  | .009     | 0.9                  | .48      | .21                          | 0.8                                 | .001     | 1.0                                 | .79      | .03                          |

| <b>Outcome:</b>                          | <b>IP Group</b> |          | <b>IS Group</b> |          | <b>Inter-</b> | <b>Below Median</b> |          | <b>Above Median</b> |          | <b>Inter-</b> |
|------------------------------------------|-----------------|----------|-----------------|----------|---------------|---------------------|----------|---------------------|----------|---------------|
| <b>CV Death/Non-Procedural MI/Stroke</b> |                 |          |                 |          | <b>action</b> | <b>BMI ≤31</b>      |          | <b>BMI &gt;31</b>   |          | <b>action</b> |
| <b>Events/N in subgroup at baseline</b>  | <b>191/1163</b> |          | <b>173/1167</b> |          |               | <b>170/1112</b>     |          | <b>194/1218</b>     |          |               |
|                                          | <b>HR</b>       | <b>P</b> | <b>HR</b>       | <b>P</b> | <b>P</b>      | <b>HR</b>           | <b>P</b> | <b>HR</b>           | <b>P</b> | <b>P</b>      |
|                                          | <b>(95% CI)</b> |          | <b>(95% CI)</b> |          |               | <b>(95% CI)</b>     |          | <b>(95% CI)</b>     |          |               |
|                                          | (0.7, 1.0)      |          | (0.8, 1.1)      |          |               | (0.7, 0.9)          |          | (0.9, 1.2)          |          |               |
| Change from Baseline Log leptin/BMI      | 0.9             | .16      | 0.8             | .01      | .46           | 0.8                 | .007     | 0.8                 | .06      | .85           |
|                                          | (0.7, 1.1)      |          | (0.6, 0.9)      |          |               | (0.7, 0.9)          |          | (0.7, 1.0)          |          |               |
| Baseline Log TNF-α                       | 1.3             | .001     | 1.2             | .10      | .29           | 1.4                 | <.001    | 1.2                 | .05      | .61           |
|                                          | (1.1, 1.5)      |          | (1.0, 1.4)      |          |               | (1.2, 1.7)          |          | (1.0, 1.3)          |          |               |
| Change from Baseline Log TNF-α           | 1.2             | .001     | 1.1             | .16      | .45           | 1.1                 | .23      | 1.2                 | .001     | .02           |
|                                          | (1.1, 1.3)      |          | (1.0, 1.3)      |          |               | (0.9, 1.3)          |          | (1.1, 1.3)          |          |               |
| Baseline Log CRP                         | 1.6             | <.001    | 1.3             | .002     | .12           | 1.8                 | <.001    | 1.3                 | .005     | .03           |
|                                          | (1.4, 1.9)      |          | (1.1, 1.6)      |          |               | (1.5, 2.2)          |          | (1.1, 1.5)          |          |               |
| Change from Baseline Log CRP             | 1.4             | <.001    | 1.2             | .10      | .15           | 1.1                 | .20      | 1.5                 | <.001    | .13           |
|                                          | (1.2, 1.7)      |          | (1.0, 1.4)      |          |               | (0.9, 1.4)          |          | (1.2, 1.7)          |          |               |
| Baseline Log IL-6                        | 1.4             | .002     | 1.3             | .02      | .57           | 1.7                 | <.001    | 1.1                 | .14      | .03           |
|                                          | (1.1, 1.7)      |          | (1.0, 1.5)      |          |               | (1.4, 2.2)          |          | (1.0, 1.3)          |          |               |
| Change from Baseline Log IL-6            | 1.2             | .04      | 1.0             | .66      | .27           | 1.2                 | .06      | 1.1                 | .49      | .41           |
|                                          | (1.0, 1.4)      |          | (0.9, 1.3)      |          |               | (1.0, 1.6)          |          | (0.9, 1.2)          |          |               |
| Baseline Log BMI                         | 0.4             | .004     | 0.5             | .02      | .28           | 0.4                 | .01      | 1.0                 | .93      | <.001         |
|                                          | (0.2, 0.7)      |          | (0.2, 0.9)      |          |               | (0.2, 0.8)          |          | (0.5, 2.2)          |          |               |
| Change from Baseline Log BMI             | 0.7             | .06      | 0.7             | .06      | .93           | 0.4                 | <.001    | 1.1                 | .52      | .001          |
|                                          | (0.5, 1.0)      |          | (0.5, 1.0)      |          |               | (0.3, 0.6)          |          | (0.8, 1.6)          |          |               |

| Outcome:                                     | IP Group   |     | IS Group   |     | Inter-<br>action | Below Median |      | Above Median |     | Inter-<br>action |
|----------------------------------------------|------------|-----|------------|-----|------------------|--------------|------|--------------|-----|------------------|
|                                              | 191/1163   |     | 173/1167   |     |                  | 170/1112     |      | 194/1218     |     |                  |
| CV Death/Non-Procedural MI/Stroke            |            |     |            |     |                  |              |      |              |     |                  |
| Events/N in subgroup at baseline             |            |     |            |     |                  |              |      |              |     |                  |
|                                              | HR         | P   | HR         | P   | P                | HR           | P    | HR           | P   | P                |
|                                              | (95% CI)   |     | (95% CI)   |     |                  | (95% CI)     |      | (95% CI)     |     |                  |
| Baseline Log Waist Circumference             | 1.0        | .89 | 1.1        | .35 | .39              | 0.7          | .008 | 1.5          | .01 | .009             |
|                                              | (0.8, 1.4) |     | (0.9, 1.5) |     |                  | (0.5, 0.9)   |      | (1.1, 1.9)   |     |                  |
| Change from Baseline Log Waist Circumference | 1.0        | .79 | 0.9        | .34 | .39              | 0.6          | .02  | 1.2          | .20 | .03              |
|                                              | (0.8, 1.4) |     | (0.6, 1.2) |     |                  | (0.4, 0.9)   |      | (0.9, 1.6)   |     |                  |

All models fully adjusted.

BMI and waist circumference were measured at the same time as the adipokine values

**Supplemental Table 2S.** Interactions between sex and adipokine values on the composite endpoint of CV death, non-procedural MI and stroke.

| <b>Outcome: CV Death/Non-Procedural MI/Stroke</b> | <b>Females</b>  |          | <b>Males</b>    |          | <b>Interaction</b> |
|---------------------------------------------------|-----------------|----------|-----------------|----------|--------------------|
| <b>Events/N in subgroup at baseline</b>           | <b>127/693</b>  |          | <b>237/1637</b> |          |                    |
| <b>Covariate</b>                                  | <b>HR</b>       | <b>P</b> | <b>HR</b>       | <b>P</b> | <b>P</b>           |
|                                                   | <b>(95% CI)</b> |          | <b>(95% CI)</b> |          |                    |
| Baseline Log leptin                               | 0.9             | .58      | 0.8             | .01      | .31                |
|                                                   | (0.7, 1.2)      |          | (0.7, 1.0)      |          |                    |
| Change from Baseline Log leptin                   | 0.8             | .02      | 0.8             | .01      | .94                |
|                                                   | (0.7, 1.0)      |          | (0.7, 0.9)      |          |                    |
| Baseline Log adiponectin                          | 1.3             | .04      | 1.2             | .06      | .50                |
|                                                   | (1.0, 1.6)      |          | (1.0, 1.3)      |          |                    |
| Change from Baseline Log adiponectin              | 0.9             | .45      | 1.1             | .44      | .28                |
|                                                   | (0.7, 1.2)      |          | (0.9, 1.2)      |          |                    |
| Baseline Log MCP-1                                | 0.9             | .12      | 1.0             | .83      | .26                |
|                                                   | (0.7, 1.0)      |          | (0.8, 1.1)      |          |                    |
| Change from Baseline Log MCP-1                    | 1.1             | .41      | 1.0             | .83      | .43                |
|                                                   | (0.9, 1.4)      |          | (0.8, 1.2)      |          |                    |
| Baseline Log leptin/adiponectin                   | 0.8             | .05      | 0.8             | .004     | .85                |
|                                                   | (0.7, 1.0)      |          | (0.7, 0.9)      |          |                    |
| Change from Baseline Log leptin/adiponectin       | 0.8             | .10      | 0.8             | .01      | .75                |
|                                                   | (0.7, 1.0)      |          | (0.7, 1.0)      |          |                    |
| Baseline Log leptin/BMI                           | 0.9             | .51      | 0.9             | .03      | .49                |
|                                                   | (0.8, 1.2)      |          | (0.7, 1.0)      |          |                    |
| Change from Baseline Log leptin/BMI               | 0.8             | .01      | 0.8             | .10      | .60                |
|                                                   | (0.7, 0.9)      |          | (0.7, 1.0)      |          |                    |

| <b>Outcome: CV Death/Non-Procedural MI/Stroke</b> | <b>Females</b>  |          | <b>Males</b>    |          | <b>Interaction</b> |
|---------------------------------------------------|-----------------|----------|-----------------|----------|--------------------|
| <b>Events/N in subgroup at baseline</b>           | <b>127/693</b>  |          | <b>237/1637</b> |          |                    |
| <b>Covariate</b>                                  | <b>HR</b>       | <b>P</b> | <b>HR</b>       | <b>P</b> | <b>P</b>           |
|                                                   | <b>(95% CI)</b> |          | <b>(95% CI)</b> |          |                    |
| Baseline Log TNF- $\alpha$                        | 1.2             | .05      | 1.2             | .003     | .99                |
|                                                   | (1.0, 1.5)      |          | (1.1, 1.4)      |          |                    |
| Change from Baseline Log TNF- $\alpha$            | 1.0             | .74      | 1.2             | <.001    | .11                |
|                                                   | (0.9, 1.2)      |          | (1.1, 1.4)      |          |                    |
| Baseline Log CRP                                  | 1.1             | .56      | 1.0             | .70      | .47                |
|                                                   | (0.9, 1.3)      |          | (0.8, 1.1)      |          |                    |
| Change from Baseline Log CRP                      | 0.9             | .50      | 0.9             | .15      | .82                |
|                                                   | (0.8, 1.1)      |          | (0.8, 1.0)      |          |                    |
| Baseline Log IL-6                                 | 1.2             | .07      | 1.6             | <.001    | .03                |
|                                                   | (1.0, 1.5)      |          | (1.4, 1.9)      |          |                    |
| Change from Baseline Log IL-6                     | 1.1             | .33      | 1.4             | <.001    | .14                |
|                                                   | (0.9, 1.4)      |          | (1.2, 1.6)      |          |                    |
| Baseline Log BMI                                  | 0.9             | .22      | 1.1             | .09      | .04                |
|                                                   | (0.7, 1.1)      |          | (1.0, 1.3)      |          |                    |
| Change from Baseline Log BMI                      | 0.8             | .08      | 1.3             | .01      | .003               |
|                                                   | (0.6, 1.0)      |          | (1.1, 1.5)      |          |                    |
| Baseline Log Waist Circumference                  | 0.5             | .09      | 0.4             | .02      | .72                |
|                                                   | (0.2, 1.1)      |          | (0.2, 0.9)      |          |                    |
| Change from Baseline Log Waist Circumference      | 0.8             | .28      | 0.7             | .01      | .44                |
|                                                   | (0.6, 1.2)      |          | (0.5, 0.9)      |          |                    |

BMI and waist circumference were measured at the same time as the adipokine values

**Table 3S.** Effect of adipokines on the composite endpoint of CV death, non-procedural MI and stroke by Baseline BMI quintiles.

| <b>Baseline BMI Quintiles</b>               | <b>Q1</b>               | <b>Q2</b>               | <b>Q3</b>               | <b>Q4</b>               | <b>Q5</b>               | <b>Inter-action</b> |
|---------------------------------------------|-------------------------|-------------------------|-------------------------|-------------------------|-------------------------|---------------------|
| <b>BMI Range</b>                            | <b>18&lt;=BMI&lt;27</b> | <b>27&lt;=BMI&lt;30</b> | <b>30&lt;=BMI&lt;32</b> | <b>32&lt;=BMI&lt;36</b> | <b>36&lt;=BMI&lt;66</b> |                     |
| <b>Events/N in Quintile at baseline*</b>    | <b>71/460</b>           | <b>72/462</b>           | <b>64/465</b>           | <b>75/465</b>           | <b>80/458</b>           |                     |
|                                             | <b>HR (95% CI)</b>      | <b>P</b>            |
| Baseline Log leptin                         | 0.8 (0.6, 1.0)          | 1.0 (0.8, 1.4)          | 0.6 (0.4, 0.8)          | 1.1 (0.7, 1.8)          | 1.4 (0.9, 2.0)          | .03                 |
| Change from Baseline Log leptin             | 0.8 (0.6, 1.0)          | 1.0 (0.7, 1.3)          | 0.7 (0.5, 0.9)          | 0.6 (0.5, 0.9)          | 1.0 (0.7, 1.3)          | .06                 |
| Baseline Log adiponectin                    | 1.7 (1.2, 2.2)          | 1.1 (0.8, 1.6)          | 1.3 (0.9, 1.7)          | 0.7 (0.5, 0.9)          | 1.4 (1.1, 1.9)          | .01                 |
| Change from Baseline Log adiponectin        | 0.9 (0.6, 1.3)          | 0.9 (0.6, 1.2)          | 1.2 (0.9, 1.7)          | 1.0 (0.7, 1.4)          | 1.0 (0.7, 1.4)          | .69                 |
| Baseline Log MCP-1                          | 1.1 (0.8, 1.4)          | 1.0 (0.7, 1.3)          | 0.8 (0.6, 1.0)          | 1.0 (0.8, 1.3)          | 0.8 (0.6, 1.1)          | .71                 |
| Change from Baseline Log MCP-1              | 1.8 (1.2, 2.7)          | 1.1 (0.8, 1.6)          | 0.8 (0.6, 1.1)          | 0.8 (0.6, 1.1)          | 1.0 (0.7, 1.4)          | .03                 |
| Baseline Log leptin/adiponectin             | 0.7 (0.6, 0.9)          | 1.0 (0.7, 1.3)          | 0.6 (0.5, 0.9)          | 1.5 (1.0, 2.3)          | 0.9 (0.6, 1.2)          | .03                 |
| Change from Baseline Log leptin/adiponectin | 0.8 (0.6, 1.1)          | 1.1 (0.7, 1.5)          | 0.7 (0.5, 0.9)          | 0.7 (0.5, 0.9)          | 1.0 (0.7, 1.4)          | .06                 |

---

|                                        |                |                |                |                |                |       |
|----------------------------------------|----------------|----------------|----------------|----------------|----------------|-------|
| Baseline Log leptin/BMI                | 0.8 (0.7, 1.0) | 1.0 (0.8, 1.3) | 0.7 (0.5, 0.9) | 1.2 (0.8, 1.8) | 1.3 (0.9, 1.8) | .04   |
| Change from Baseline Log leptin/BMI    | 0.8 (0.7, 1.1) | 1 (0.7, 1.4)   | 0.8 (0.6, 1.1) | 0.6 (0.4, 0.9) | 0.9 (0.6, 1.2) | .18   |
| Baseline Log TNF- $\alpha$             | 1.6 (1.1, 2.3) | 1.5 (1.1, 2.0) | 1.1 (0.8, 1.5) | 1.0 (0.7, 1.3) | 1.2 (0.9, 1.6) | .26   |
| Change from Baseline Log TNF- $\alpha$ | 1.2 (1.0, 1.5) | 1.4 (1.1, 1.8) | 1.0 (0.7, 1.2) | 0.9 (0.7, 1.2) | 1.3 (1.1, 1.5) | .02   |
| Baseline Log CRP                       | 1.5 (1.1, 2.0) | 1.8 (1.3, 2.5) | 1.7 (1.3, 2.4) | 1.7 (1.2, 2.3) | 1.0 (0.7, 1.4) | .06   |
| Change from Baseline Log CRP           | 1.1 (0.8, 1.5) | 1.7 (1.2, 2.2) | 1.4 (0.9, 2.0) | 1.5 (1.1, 2.0) | 1.4 (1.0, 2.0) | .47   |
| Baseline Log IL-6                      | 1.8 (1.3, 2.6) | 1.5 (1.1, 2.1) | 1.2 (0.9, 1.5) | 1.2 (0.9, 1.7) | 1.1 (0.8, 1.6) | 0.29  |
| Change from Baseline Log IL-6          | 1.1 (0.8, 1.6) | 1.8 (1.3, 2.6) | 0.7 (0.5, 0.9) | 1.1 (0.8, 1.5) | 1.2 (0.9, 1.5) | 0.005 |

---

All models fully adjusted.

\* There were 20 people missing baseline BMI measures, two of which had events. Thus this table represents 2310 participants and 362 events.

**Table 4S.** Effect of adipokines on the composite endpoint of CV death, non-procedural MI and stroke by leptin/adiponectin quintiles.

| Leptin/Adiponectin Quintiles         | Q1                  | Q2                | Q3                | Q4                 | Q5                   | Interaction |
|--------------------------------------|---------------------|-------------------|-------------------|--------------------|----------------------|-------------|
|                                      | Men:<br>0.001-1.1   | Men:<br>1.1-2.2   | Men:<br>2.2-4.1   | Men:<br>4.1-7.3    | Men:<br>7.4-116.7    |             |
|                                      | Women:<br>0.001-2.2 | Women:<br>2.2-4.3 | Women:<br>4.3-7.5 | Women:<br>7.5-12.5 | Women:<br>12.5-111.2 |             |
| Quintile Ranges                      |                     |                   |                   |                    |                      |             |
| Events/N in Quintile at baseline     | 86/476              | 71/464            | 56/464            | 64/462             | 87/464               |             |
|                                      | HR<br>(95% CI)      | HR<br>(95% CI)    | HR<br>(95% CI)    | HR<br>(95% CI)     | HR<br>(95% CI)       | P           |
| Baseline Log leptin                  | 0.7 (0.6, 0.9)      | 1.1 (0.6, 2.0)    | 1.7 (0.9, 3.1)    | 1.3 (0.7, 2.3)     | 1.1 (0.6, 1.8)       | .008        |
| Change from Baseline Log leptin      | 0.8 (0.7, 1.0)      | 0.8 (0.6, 1.2)    | 0.7 (0.5, 1.1)    | 0.9 (0.6, 1.3)     | 0.9 (0.7, 1.1)       | .98         |
| Baseline Log adiponectin             | 1.2 (0.9, 1.7)      | 1.1 (0.8, 1.7)    | 1.8 (1.1, 2.9)    | 1.2 (0.8, 1.7)     | 1.0 (0.7, 1.3)       | .62         |
| Change from Baseline Log adiponectin | 1.1 (0.8, 1.6)      | 1.0 (0.7, 1.4)    | 1.2 (0.9, 1.7)    | 0.9 (0.6, 1.3)     | 0.9 (0.7, 1.2)       | .35         |
| Baseline Log MCP-1                   | 1.2 (0.9, 1.6)      | 1.0 (0.7, 1.4)    | 1.1 (0.8, 1.6)    | 0.9 (0.7, 1.2)     | 0.7 (0.6, 0.9)       | .14         |
| Change from Baseline Log MCP-1       | 1.6 (1.2, 2.3)      | 1.0 (0.7, 1.6)    | 1.1 (0.7, 1.8)    | 1.1 (0.8, 1.6)     | 0.8 (0.6, 1.0)       | .02         |
| Baseline Log leptin/adiponectin      | 0.7 (0.5, 0.9)      | 0.9 (0.2, 4.7)    | 0.3 (0.0, 2.3)    | 2.1 (0.2, 18.0)    | 1.3 (0.7, 2.6)       | .95         |



|                                                |                |                |                |                |                |      |
|------------------------------------------------|----------------|----------------|----------------|----------------|----------------|------|
| Change from Baseline<br>Log leptin/adiponectin | 0.8 (0.6, 1.0) | 0.9 (0.6, 1.3) | 0.7 (0.5, 1.1) | 1.0 (0.6, 1.5) | 0.9 (0.7, 1.1) | .53  |
| Baseline Log<br>leptin/BMI                     | 0.8 (0.6, 0.9) | 1.2 (0.7, 2.1) | 1.9 (1.1, 3.4) | 1.4 (0.8, 2.4) | 1.0 (0.7, 1.6) | .01  |
| Change from Baseline<br>Log leptin/BMI         | 1.0 (0.8, 1.2) | 0.8 (0.5, 1.2) | 0.6 (0.4, 1.0) | 0.9 (0.6, 1.5) | 0.8 (0.6, 1.0) | .43  |
| Baseline Log TNF- $\alpha$                     | 1.3 (1.0, 1.7) | 1.5 (1.0, 1.2) | 1.2 (0.9, 1.6) | 1.0 (0.7, 1.4) | 1.3 (1.0, 1.6) | .46  |
| Change from Baseline<br>Log TNF- $\alpha$      | 1.3 (1.0, 1.6) | 1.2 (1.0, 1.4) | 1.1 (0.8, 1.4) | 1.3 (0.9, 1.7) | 1.2 (1.0, 1.4) | .91  |
| Baseline Log CRP                               | 2.1 (1.6, 2.8) | 1.2 (0.9, 1.7) | 1.5 (1.0, 2.1) | 1.5 (1.1, 2.2) | 1.1 (0.8, 1.5) | .007 |
| Change from Baseline<br>Log CRP                | 1.6 (1.2, 2.1) | 1.1 (0.8, 1.6) | 1.4 (1.0, 2.0) | 1.5 (1.1, 2.2) | 1.1 (0.8, 1.4) | .03  |
| Baseline Log IL-6                              | 1.6 (1.2, 2.1) | 1.3 (1.0, 1.7) | 1.6 (1.1, 2.5) | 1.1 (0.7, 1.5) | 1.2 (0.9, 1.6) | .51  |
| Change from Baseline<br>Log IL-6               | 1.2 (0.9, 1.6) | 1.1 (0.8, 1.4) | 1.3 (0.9, 1.9) | 1.2 (0.9, 1.7) | 1.1 (0.8, 1.3) | .45  |

---

**Supplementary Figure 1.** Distribution of the Standardized Log Leptin value by BMI quintile at Baseline (a), Year 1 (b), and the Last Time Point (c).

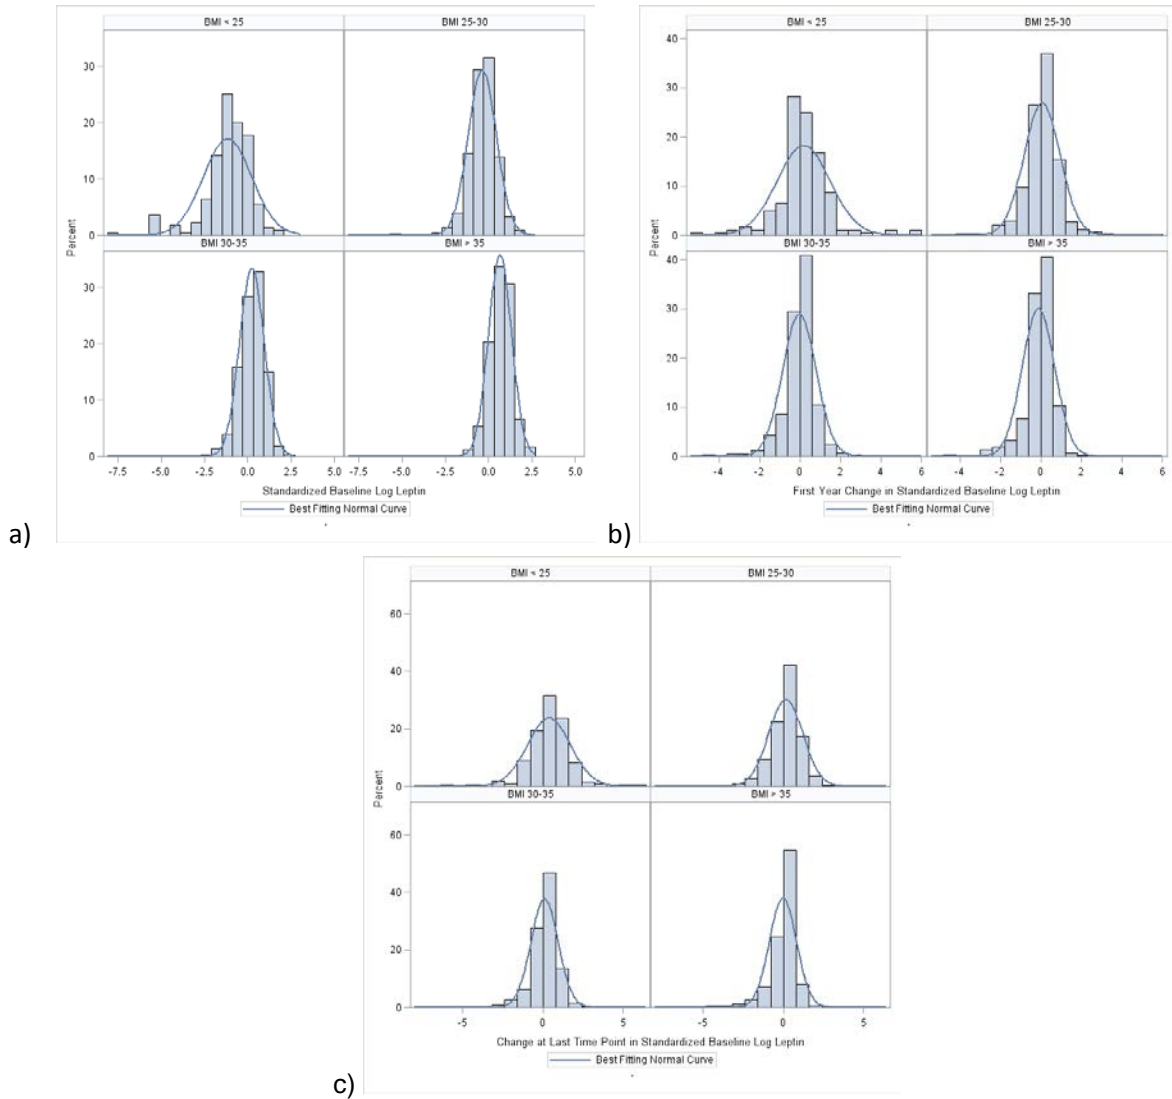

**Supplementary Figure 2.** Distribution of the Standardized Log Adiponectin value by BMI quintile at Baseline (a), Year 1 (b), and at the Last Time Point (c).

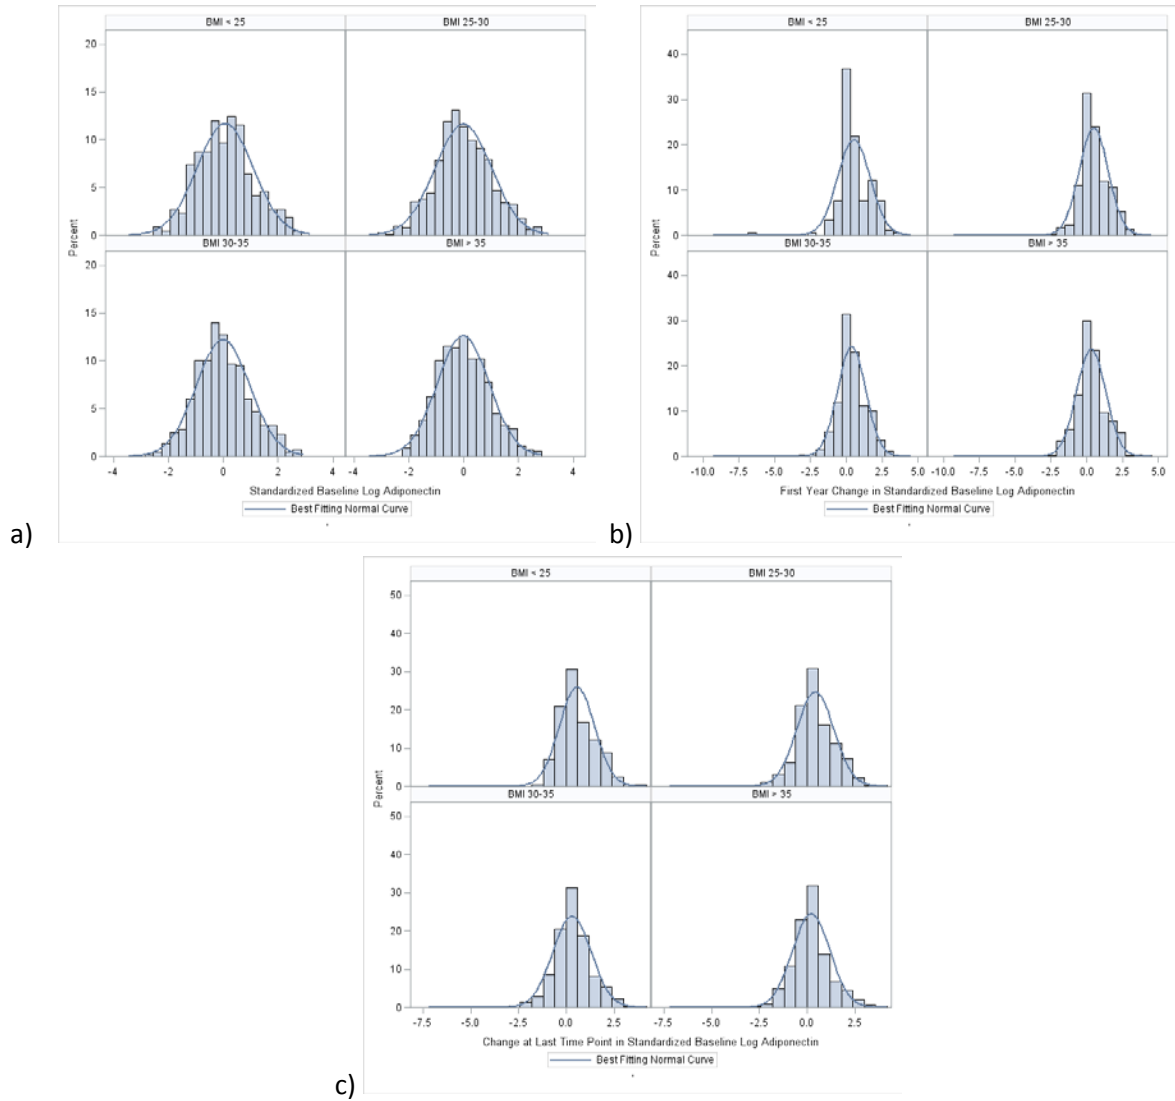

**Supplementary Figure 3.** Standardized Baseline Log Leptin (a) and Change from Standardized Baseline Log Leptin at Year 1 (b) and at the Last Time Point (c).

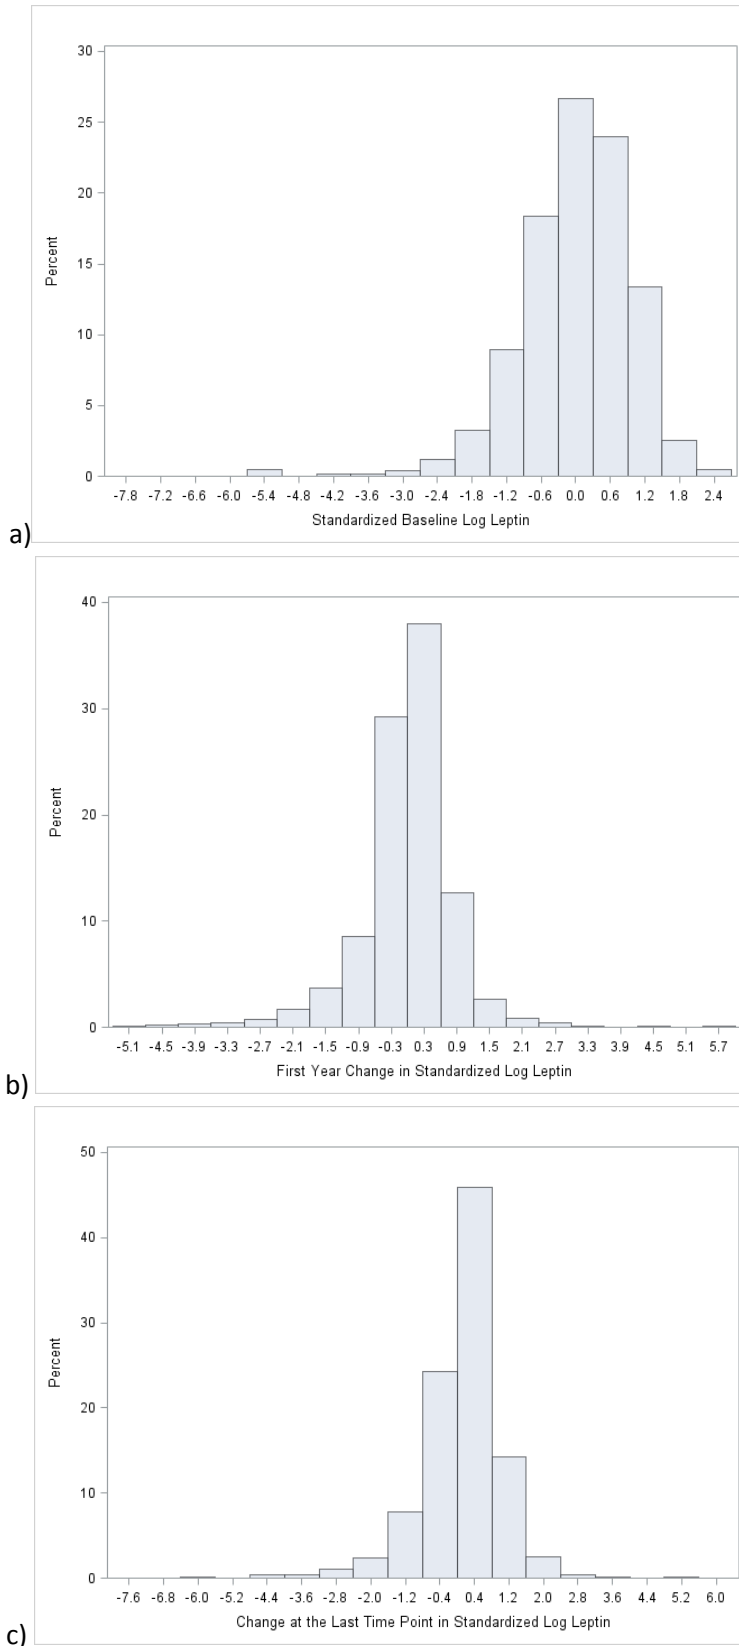

**Supplementary Figure 4.** Standardized Baseline Log Adiponectin (a) and Change from Standardized Baseline Log Adiponectin at Year 1 (b) and at the Last Time Point (c).

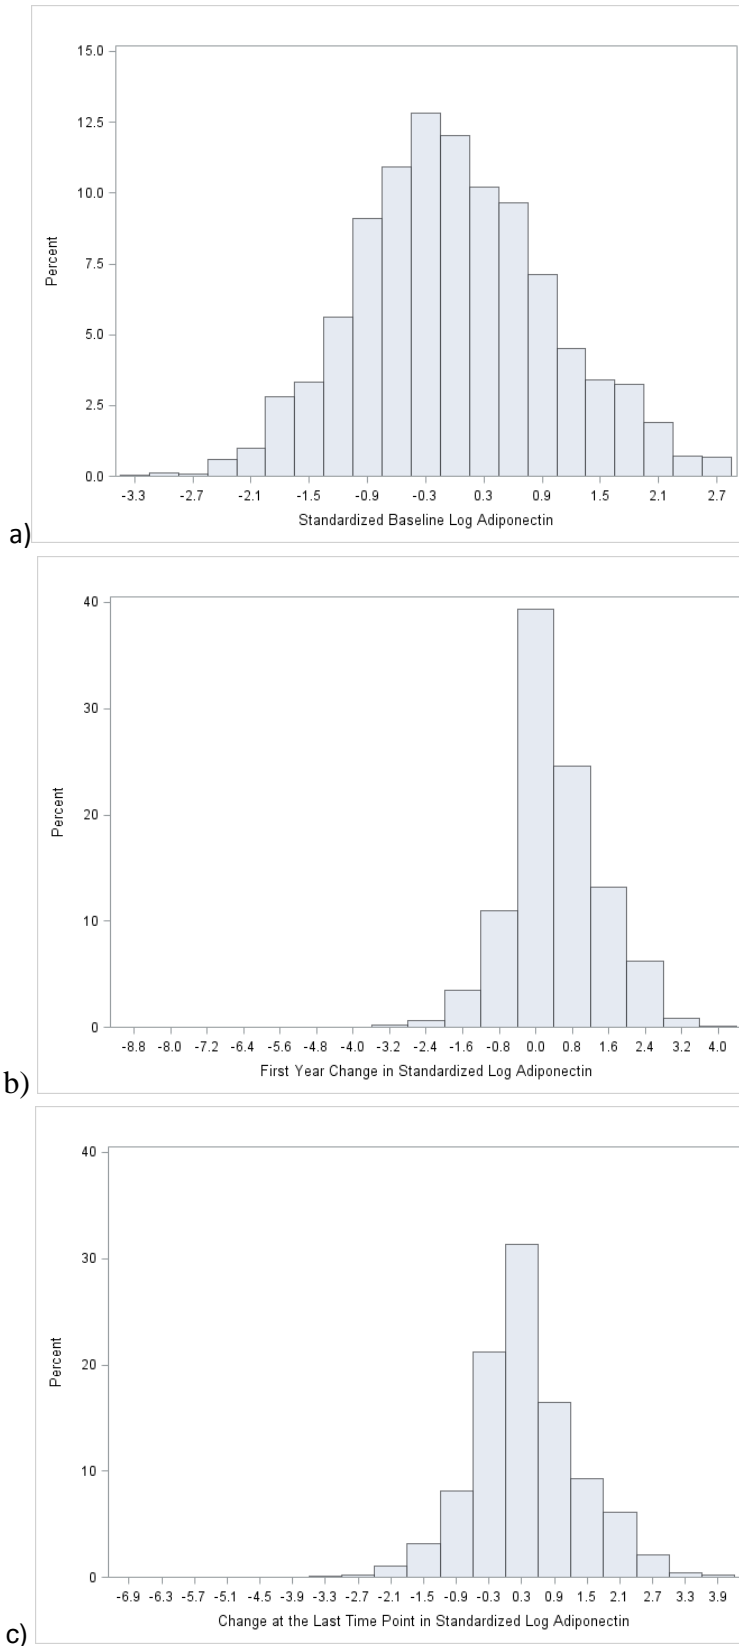

Supplement: NIHMS794543-supplement-2.pdf [file NIHMS794543-supplement-2.pdf]
